# Supplementary material for: Time in Range for Closed-Loop Systems versus Standard of Care during Physical Exercise in People with Type 1 Diabetes: A Systematic Review and Meta-Analysis
Source: MDPI journal article supplement (doi:10.3390/jcm10112445), 2021-05-31
Supplement: s1 [file s1]

## Supplemental Material

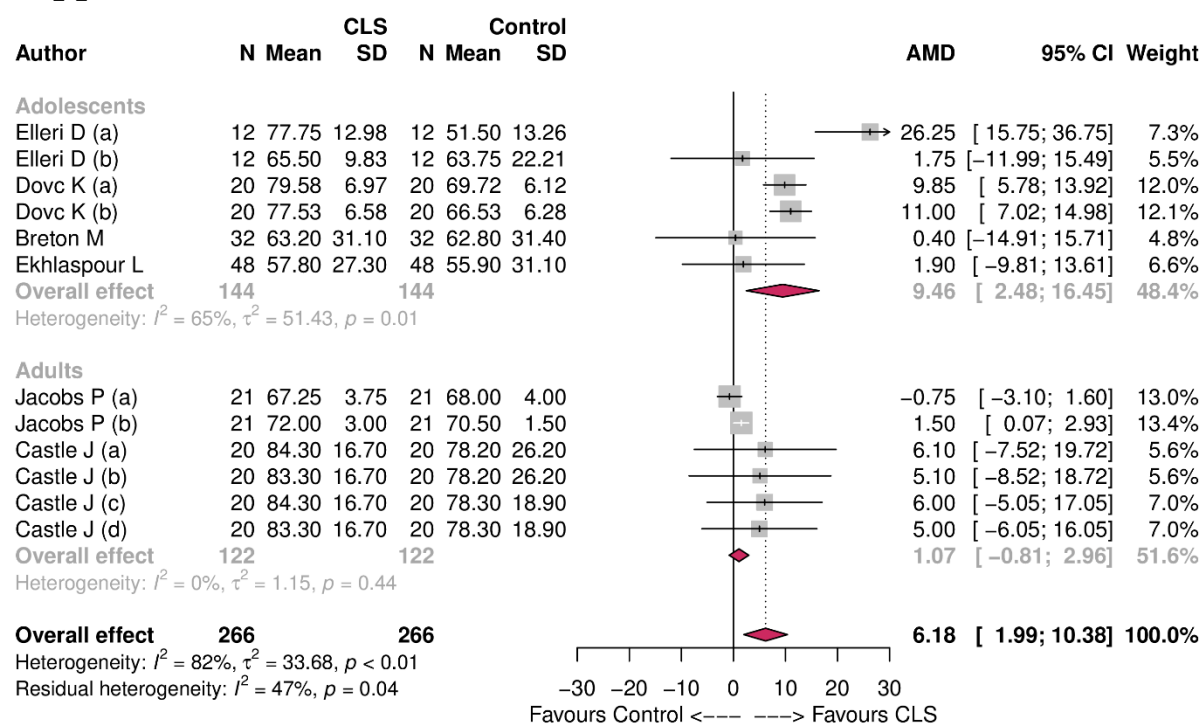

**Figure S1:** Subgroup analysis on age

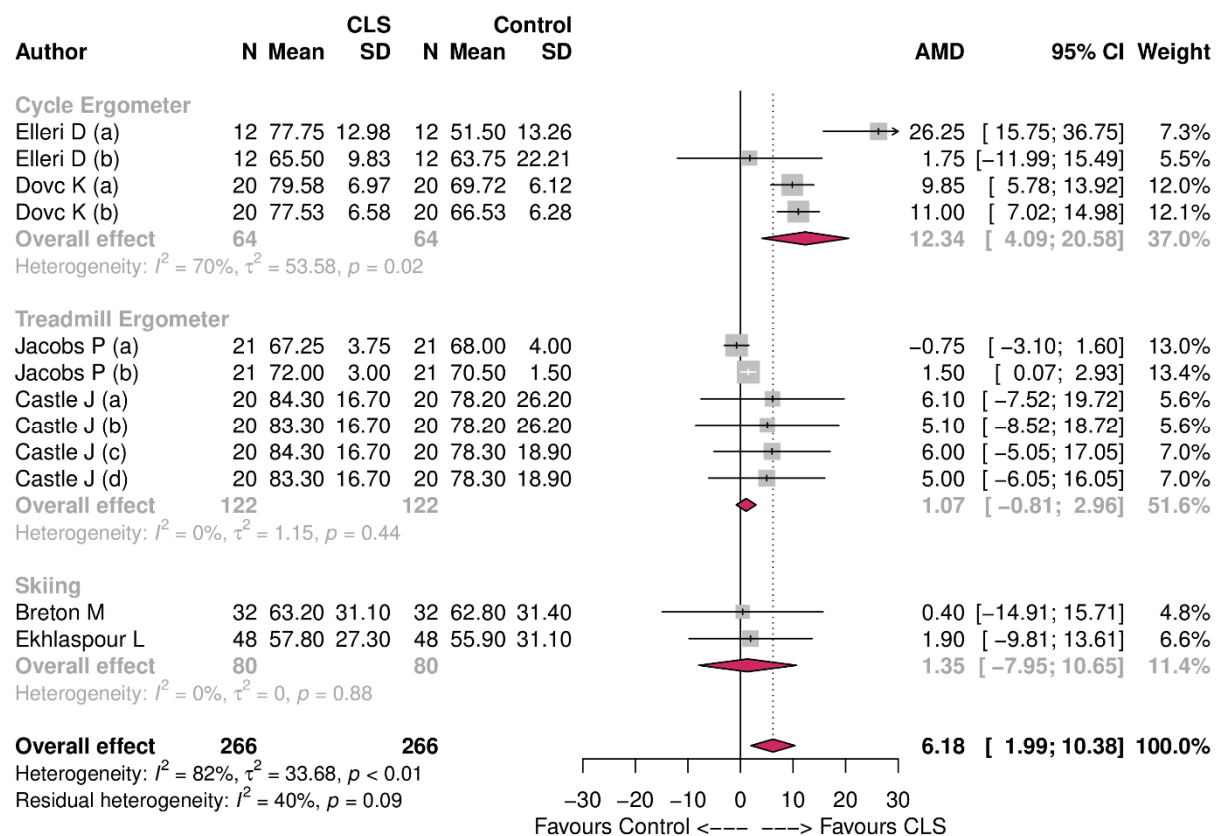

**Figure S2:** Subgroup analysis on type of exercise

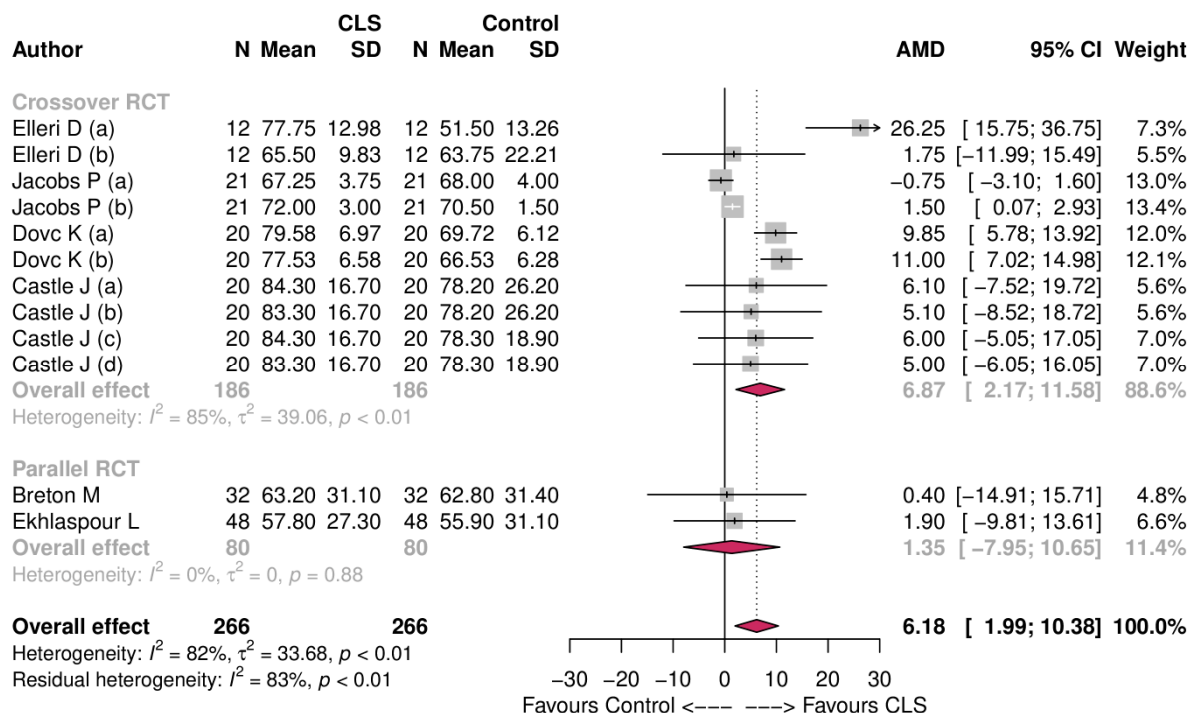

**Figure S3:** Subgroup analysis on study type

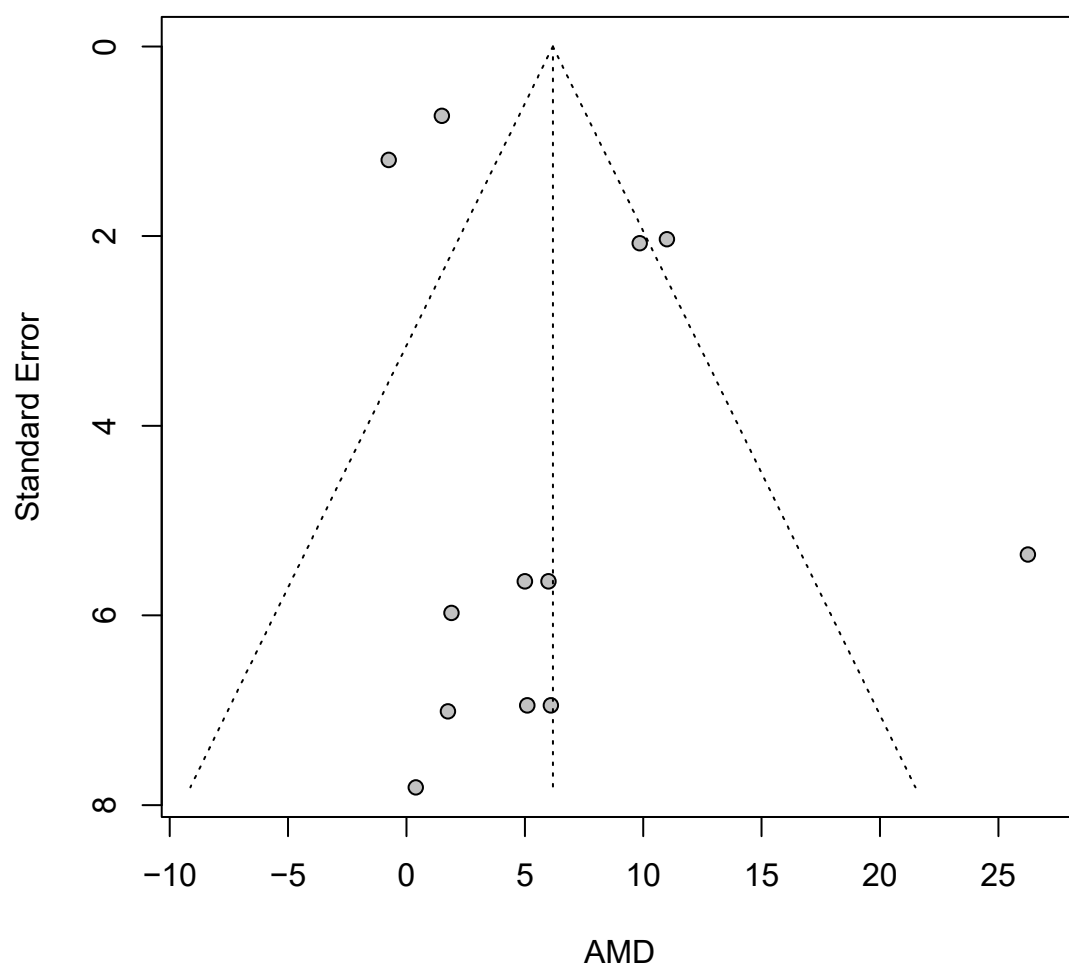

**Figure S4:** \*Egger's test: p-value = 0.13

**Table S1:** Search Pubmed, January 2020

| #   | Term                                                                               | Hits   |
|-----|------------------------------------------------------------------------------------|--------|
| #1  | (diabetes mellitus, type 1 [mh])                                                   | 74437  |
| #2  | (type 1 diabetes mellitus [tw])                                                    | 77016  |
| #3  | (type 1 diabetes [tw])                                                             | 38803  |
| #4  | ("type i" diabetes mellitus [tw])                                                  | 8600   |
| #5  | ("type-i" diabetes mellitus [tw])                                                  | 8600   |
| #6  | ("insulin-dependent" diabet* [tw])                                                 | 27696  |
| #7  | (Artificial pancreas [mh])                                                         | 735    |
| #8  | (Bioartificial Organs [mh] AND (pancreas [tw] OR insulin [tw] OR diabet* [tw]))    | 75     |
| #9  | (Bionics [mh] AND (pancreas [tw] OR insulin [tw] OR diabet* [tw]))                 | 8      |
| #10 | ("synthetic pancreas" [tw] AND (insulin [tw] OR diabet* [tw]))                     | 4      |
| #11 | ("artificial endocrine pancreas" [tw] AND (insulin [tw] OR diabet* [tw]))          | 195    |
| #12 | (artificial beta cell* [tw] OR artificial b cell* [tw] OR artificial b-cell* [tw]) | 159    |
| #13 | (closed-loop* [tw] AND (pancreas [tw] OR insulin [tw] OR diabet* [tw]))            | 1124   |
| #14 | ("closed loop*" AND (pancreas [tw] OR insulin [tw] OR diabet* [tw]))               | 1125   |
| #15 | ("bioartificial pancreas" [tw] OR "bio-artificial pancreas" [tw])                  | 269    |
| #16 | #1 - #15 OR                                                                        | 104067 |
| #17 | (insulin pump [tw])                                                                | 2184   |
| #18 | (insulin delivery system* [tw])                                                    | 488    |
| #19 | (insulin [tw])                                                                     | 406540 |
| #20 | (Infusion Pumps, Implantable [mh])                                                 | 3616   |
| #21 | (Insulin Infusion System [mh])                                                     | 5136   |
| #22 | (continuous subcutaneous insulin infusion [tw])                                    | 1935   |
| #23 | (csii [tw])                                                                        | 1492   |
| #24 | #17 - #23 OR                                                                       | 409716 |
| #25 | #16 AND #24                                                                        | 56261  |
| #26 | (glucose [tw] AND (sensor* [tw] OR sensing*))                                      | 13781  |
| #27 | ("sensed glucose" [tw])                                                            | 8      |

|     |                                         |        |
|-----|-----------------------------------------|--------|
| #28 | (CGM [tw])                              | 2135   |
| #29 | (CGMS [tw])                             | 642    |
| #30 | (RTCGM [tw])                            | 39     |
| #31 | (RTCGMS [tw])                           | 3      |
| #32 | (ICGM [tw])                             | 11     |
| #33 | (glucoWatch [tw])                       | 54     |
| #34 | (medtronic [tw] AND diabet*)            | 423    |
| #35 | (dexcom [tw] AND diabet*)               | 154    |
| #36 | (abbott [tw] AND diabet*)               | 298    |
| #37 | (omnipod [tw] AND diabet*)              | 37     |
| #38 | (tandem [tw] AND diabet*)               | 2472   |
| #39 | (animas [tw] AND diabet*)               | 17     |
| #40 | (roche [tw] AND diabet*)                | 361    |
| #41 | #26 – #40 OR                            | 18984  |
| #42 | #16 AND #24 AND #41                     | 1943   |
| #43 | (Exercise [mh])                         | 187953 |
| #44 | (Resistance Training [mh])              | 8109   |
| #45 | (High-Intensity Interval Training [mh]) | 850    |
| #46 | (high-intensity training [tw])          | 703    |
| #47 | (high intensity training [tw])          | 703    |
| #48 | (physical activity [tw])                | 104733 |
| #49 | #43 – #48 OR                            | 253679 |
| #50 | #16 AND #24 AND #41 AND #49             | 92     |
| #51 | Limit: humans and english language      | 79     |

**Table S2:** Search Embase, January 2020

| #   | Term                                                                    | Hits   |
|-----|-------------------------------------------------------------------------|--------|
| #1  | (diabetes mellitus, type 1).mp.                                         | 3186   |
| #2  | (type 1 diabetes mellitus).mp.                                          | 16025  |
| #3  | (type 1 diabetes).mp.                                                   | 62482  |
| #4  | ("type i" diabetes mellitus).mp.                                        | 2474   |
| #5  | ("type-i" diabetes mellitus).mp.                                        | 2474   |
| #6  | ("insulin-dependent" diabet*).mp.                                       | 340700 |
| #7  | (artificial pancreas).mp.                                               | 2906   |
| #8  | (Bioartificial Organs AND (pancreas OR insulin OR diabet*)).mp.         | 22     |
| #9  | (Bionics AND (pancreas OR insulin OR diabet*)).mp.                      | 27     |
| #10 | ("synthetic pancreas" AND (insulin OR diabet*)).mp.                     | 7      |
| #11 | ("artificial endocrine pancreas" AND (insulin OR diabet*)).mp.          | 276    |
| #12 | (artificial beta cell* OR artificial b cell* OR artificial b-cell*).mp. | 210    |
| #13 | (closed-loop* AND (pancreas OR insulin OR diabet*)).mp.                 | 2072   |
| #14 | ("closed loop*" AND (pancreas OR insulin OR diabet*)).mp.               | 2072   |
| #15 | ("bioartificial pancreas" OR "bio-artificial pancreas").mp.             | 391    |
| #16 | #1 - #15 OR                                                             | 352561 |
| #17 | (insulin pump).mp.                                                      | 7940   |
| #18 | (insulin delivery system*).mp.                                          | 759    |
| #19 | (insulin).mp.                                                           | 765097 |
| #20 | (Infusion Pumps, Implantable).mp.                                       | 15     |
| #21 | (Insulin Infusion System).mp.                                           | 187    |
| #22 | (continuous subcutaneous insulin infusion).mp.                          | 3371   |
| #23 | (csii).mp.                                                              | 3418   |
| #24 | #17 - #23 OR                                                            | 765224 |
| #25 | #16 AND #24                                                             | 346428 |
| #26 | (glucose AND (sensor* OR sensing*)).mp.                                 | 22379  |
| #27 | ("sensed glucose").mp.                                                  | 11     |

|     |                                        |        |
|-----|----------------------------------------|--------|
| #28 | (CGM).mp.                              | 4836   |
| #29 | (CGMS).mp.                             | 1501   |
| #30 | (RTCGM).mp.                            | 104    |
| #31 | (RTCGMS).mp.                           | 9      |
| #32 | (ICGM).mp.                             | 30     |
| #33 | (glucoWatch).mp.                       | 193    |
| #34 | (medtronic AND diabet*).mp.            | 3001   |
| #35 | (dexcom AND diabet*).mp.               | 812    |
| #36 | (abbott AND diabet*).mp.               | 2774   |
| #37 | (omnipod AND diabet*).mp.              | 208    |
| #38 | (tandem AND diabet*).mp.               | 3323   |
| #39 | (animas AND diabet*).mp.               | 219    |
| #40 | (roche AND diabet*).mp.                | 3671   |
| #41 | #26 – #40 OR                           | 37013  |
| #42 | #16 AND #24 AND #41                    | 10448  |
| #43 | (Exercise).mp.                         | 479276 |
| #44 | (Resistance Training).mp.              | 20024  |
| #45 | (High-Intensity Interval Training).mp. | 2549   |
| #46 | (high-intensity training).mp.          | 860    |
| #47 | (high intensity training).mp.          | 860    |
| #48 | (physical activity).mp.                | 201470 |
| #49 | #43 – #48 OR                           | 618491 |
| #50 | #16 AND #24 AND #41 AND #49            | 956    |
| #51 | Limit: human and english language      | 882    |



**Table S3:** Search ISY Web of Science, January 2020

| #   | Term                                                                    | Hits   |
|-----|-------------------------------------------------------------------------|--------|
| #1  | TS= (diabetes mellitus, type 1)                                         | 220703 |
| #2  | TS= (type 1 diabetes mellitus)                                          | 220703 |
| #3  | TS= (type 1 diabetes)                                                   | 250449 |
| #4  | TS= ("type i" diabetes mellitus)                                        | 17553  |
| #5  | TS= ("type-i" diabetes mellitus)                                        | 17553  |
| #6  | TS= ("insulin-dependent" diabet*)                                       | 167753 |
| #7  | TS= (artificial pancreas)                                               | 5821   |
| #8  | TS= (Bioartificial Organs AND (pancreas OR insulin OR diabet*))         | 298    |
| #9  | TS= (Bionics AND (pancreas OR insulin OR diabet*))                      | 148    |
| #10 | TS= ("synthetic pancreas" AND (insulin OR diabet*))                     | 4      |
| #11 | TS= ("artificial endocrine pancreas" AND (insulin OR diabet*))          | 328    |
| #12 | TS= (artificial beta cell* OR artificial b cell* OR artificial b-cell*) | 28435  |
| #13 | TS= (closed-loop* AND (pancreas OR insulin OR diabet*))                 | 1731   |
| #14 | TS= ("closed loop*" AND (pancreas OR insulin OR diabet*))               | 1722   |
| #15 | TS= ("bioartificial pancreas" OR "bio-artificial pancreas")             | 652    |
| #16 | #1 - #15 OR                                                             | 353226 |
| #17 | TS= (insulin pump)                                                      | 9641   |
| #18 | TS= (insulin delivery system*)                                          | 15831  |
| #19 | TS= (insulin)                                                           | 738676 |
| #20 | TS= (Infusion Pumps, Implantable)                                       | 4399   |
| #21 | TS= (Insulin Infusion System)                                           | 25341  |
| #22 | TS= (continuous subcutaneous insulin infusion)                          | 3830   |
| #23 | TS= (csii)                                                              | 2280   |
| #24 | #17 - #23 OR                                                            | 742532 |
| #25 | #16 AND #24                                                             | 229761 |
| #26 | TS= (glucose AND (sensor* OR sensing*))                                 | 43648  |
| #27 | TS= ("sensed glucose")                                                  | 10     |
| #28 | TS= (CGM)                                                               | 4319   |

|     |                                        |         |
|-----|----------------------------------------|---------|
| #29 | TS= (CGMS)                             | 1076    |
| #30 | TS= (RTCGM)                            | 58      |
| #31 | TS= (RTCGMS)                           | 4       |
| #32 | TS= (ICGM)                             | 21      |
| #33 | TS= (glucoWatch)                       | 119     |
| #34 | TS= (medtronic AND diabet*)            | 547     |
| #35 | TS= (dexcom AND diabet*)               | 229     |
| #36 | TS= (abbott AND diabet*)               | 381     |
| #37 | TS= (omnipod AND diabet*)              | 69      |
| #38 | TS= (tandem AND diabet*)               | 3395    |
| #39 | TS= (animas AND diabet*)               | 28      |
| #40 | TS= (roche AND diabet*)                | 553     |
| #41 | #26 – #40 OR                           | 52534   |
| #42 | #16 AND #24 AND #41                    | 6694    |
| #43 | TS= (Exercise)                         | 711220  |
| #44 | TS= (Resistance Training)              | 43045   |
| #45 | TS= (High-Intensity Interval Training) | 3993    |
| #46 | TS= (high-intensity training)          | 10682   |
| #47 | TS= (high intensity training)          | 23086   |
| #48 | TS= (physical activity)                | 694701  |
| #49 | #43 – #48 OR                           | 1289571 |
| #50 | #16 AND #24 AND #41 AND #49            | 445     |
| #51 | #50 NOT (animal)                       | 373     |
| #52 | Limit: english language                | 373     |

**Table S4:** Search Cochrane Controlled Register of Trials (CENTRAL)

| #   | Term                                                                    | Hits  |
|-----|-------------------------------------------------------------------------|-------|
| #1  | (diabetes mellitus, type 1).mp.                                         | 5198  |
| #2  | (type 1 diabetes mellitus).mp.                                          | 1480  |
| #3  | (type 1 diabetes).mp.                                                   | 5951  |
| #4  | ("type i" diabetes mellitus).mp.                                        | 186   |
| #5  | ("type-i" diabetes mellitus).mp.                                        | 186   |
| #6  | ("insulin-dependent" diabet*).mp.                                       | 20400 |
| #7  | (artificial pancreas).mp.                                               | 274   |
| #8  | (Bioartificial Organs AND (pancreas OR insulin OR diabet*)).mp.         | 0     |
| #9  | (Bionics AND (pancreas OR insulin OR diabet*)).mp.                      | 7     |
| #10 | ("synthetic pancreas" AND (insulin OR diabet*)).mp.                     | 0     |
| #11 | ("artificial endocrine pancreas" AND (insulin OR diabet*)).mp.          | 21    |
| #12 | (artificial beta cell* OR artificial b cell* OR artificial b-cell*).mp. | 6     |
| #13 | (closed-loop* AND (pancreas OR insulin OR diabet*)).mp.                 | 474   |
| #14 | ("closed loop*" AND (pancreas OR insulin OR diabet*)).mp.               | 474   |
| #15 | ("bioartificial pancreas" OR "bio-artificial pancreas").mp.             | 0     |
| #16 | #1 - #15 OR                                                             | 25261 |
| #17 | (insulin pump).mp.                                                      | 1084  |
| #18 | (insulin delivery system*).mp.                                          | 95    |
| #19 | (insulin).mp.                                                           | 57490 |
| #20 | (Infusion Pumps, Implantable).mp.                                       | 142   |
| #21 | (Insulin Infusion System).mp.                                           | 17    |
| #22 | (continuous subcutaneous insulin infusion).mp.                          | 667   |
| #23 | (csii).mp.                                                              | 672   |
| #24 | #17 - #23 OR                                                            | 57598 |
| #25 | #16 AND #24                                                             | 23374 |
| #26 | (glucose AND (sensor* OR sensing*)).mp.                                 | 1420  |
| #27 | ("sensed glucose").mp.                                                  | 1     |
| #28 | (CGM).mp.                                                               | 1211  |

|     |                                        |        |
|-----|----------------------------------------|--------|
| #29 | (CGMS).mp.                             | 308    |
| #30 | (RTCGM).mp.                            | 24     |
| #31 | (RTCGMS).mp.                           | 0      |
| #32 | (ICGM).mp.                             | 1      |
| #33 | (glucoWatch).mp.                       | 13     |
| #34 | (medtronic AND diabet*).mp.            | 283    |
| #35 | (dexcom AND diabet*).mp.               | 139    |
| #36 | (abbott AND diabet*).mp.               | 137    |
| #37 | (omnipod AND diabet*).mp.              | 13     |
| #38 | (tandem AND diabet*).mp.               | 174    |
| #39 | (animas AND diabet*).mp.               | 6      |
| #40 | (roche AND diabet*).mp.                | 133    |
| #41 | #26 – #40 OR                           | 2987   |
| #42 | #16 AND #24 AND #41                    | 1468   |
| #43 | (Exercise).mp.                         | 86967  |
| #44 | (Resistance Training).mp.              | 8192   |
| #45 | (High-Intensity Interval Training).mp. | 1435   |
| #46 | (high-intensity training).mp.          | 354    |
| #47 | (high intensity training).mp.          | 354    |
| #48 | (physical activity).mp.                | 27569  |
| #49 | #43 – #48 OR                           | 102845 |
| #50 | #16 AND #24 AND #41 AND #49            | 209    |
| #51 | Limit: english language                | 140    |

**Table S5:** Secondary outcomes: time in percentage below and above target range during exercise and events <3.9 mmol/L

|                  | Time spent <3.9mmol/l during exercise |                          |           |                | Time spent >10mmol/l during exercise |                  | Number of events <3.9mmol/l during exercise: |              |
|------------------|---------------------------------------|--------------------------|-----------|----------------|--------------------------------------|------------------|----------------------------------------------|--------------|
|                  | Closed-loop single hormone            | Closed-loop dual-hormone | PLGS      | Current care   | Closed-loop                          | Current care     | Closed-loop                                  | Current care |
| Elleri D (3a)    | n/a                                   | n/a                      | n/a       | n/a            | n/a                                  | n/a              | n/a                                          | n/a          |
| Elleri D (3b)    | n/a                                   | n/a                      | n/a       | n/a            | n/a                                  | n/a              | n/a                                          | n/a          |
| Jacobs P (2a)    | 0.3 [-0.1, 0.7]                       | n/a                      | n/a       | 0.8 [0.1, 1.4] | 32 [25–39]                           | 31 [24–39]       | n/a                                          | n/a          |
| Jacobs P (2b)    | 3.1 [0.8–5.3]                         | n/a                      | n/a       | n/a            | 25 [19–30]                           | n/a              | n/a                                          | n/a          |
| Dovc K (1a)      | 0.0 (0.0–0.0)                         | n/a                      | n/a       | 0.2 (0.0–4.5)  | 17.1 (7.2–33.0)                      | 25.2 (6.0–39.3)  | n/a                                          | n/a          |
| Dovc K (1b)      | 1.1 (0.0–3.4)                         | n/a                      | n/a       | 0.0 (0.0–3.3)  | 20.8 (5.0–28.9)                      | 29.6 (17.6–45.4) | n/a                                          | n/a          |
| BretonM (5)      | 1.4 ± 1.6                             | n/a                      | n/a       | 1.4 ± 1.6      | n/a                                  | n/a              | 0.3 ± 0.4                                    | 0.3 ± 0.7    |
| CastleJ (6)      | 3.4 ± 4.5                             | 8.3 ± 12.6               | 7.6 ± 8.0 | 4.3 ± 6.8      | n/a                                  | n/a              | n/a                                          | n/a          |
| Ekhlaspour L (4) | 0 (0.0, 0.8)                          | n/a                      | n/a       | 0 (0.0, 0.4)   | 41.4 ± 27.8                          | 41.5 ± 30.3      | n/a                                          | n/a          |

PLGS: predictive low-glucose suspend system

**Table S6:** Secondary outcomes: time in percentage during the post-exercise period including number of events <3.9 mmol/L

|                  | TIR during the post-exercise period: |                  | Time spent <3.9mmol/l in the post-exercise period: |                | Time spent >10mmol/l during the post-exercise period: |                 | Number of events <3.9mmol/l during the post-exercise: |              |
|------------------|--------------------------------------|------------------|----------------------------------------------------|----------------|-------------------------------------------------------|-----------------|-------------------------------------------------------|--------------|
|                  | Closed-loop                          | Current care     | Closed-loop                                        | Current care   | Closed-loop                                           | Current care    | Closed-loop                                           | Current care |
| Elleri D (3a)    | 94 (54, 100)                         | 79 (34, 100)     | 0.0 (0.0, 1.0)                                     | 0.0 (0.0, 2.4) | 1.0 (0.0–13.9)                                        | 64.6 (1.6–97.5) | n/a                                                   | n/a          |
| Elleri D (3b)    | 96 (79, 100)                         | 33 (2, 80)       | 0.2 (0.0, 4.7)                                     | 0.0 (0.0, 0.0) | n/a                                                   | n/a             | n/a                                                   | n/a          |
| Jacobs P (2a)    | n/a                                  | n/a              | n/a                                                | n/a            | n/a                                                   | n/a             | n/a                                                   | n/a          |
| Jacobs P (2b)    | n/a                                  | n/a              | n/a                                                | n/a            | n/a                                                   | n/a             | n/a                                                   | n/a          |
| Dovc K (1a)      | 92.8 (69.8–98.4)                     | 73.3 (61.3–84.2) | n/a                                                | n/a            | 7.2 (0.2–23.9)                                        | 22.7 (9.1–38.7) | 3 (in total)                                          | 4 (in total) |
| Dovc K (1b)      | n/a                                  | n/a              | 0.0 (0.0–3.5)                                      | 0.0 (0.0–2.8)  | n/a                                                   | n/a             | n/a                                                   | n/a          |
| BretonM (5)      | 79.3 ± 29.8                          | 68.8 ± 24.1      | 2.2 ± 2.3                                          | 2.5 ± 6.5      | n/a                                                   | n/a             | 0.1 ± 0.3                                             | 0.1 ± 0.4    |
| CastleJ (6)      | n/a                                  | n/a              | n/a                                                | n/a            | n/a                                                   | n/a             | n/a                                                   | n/a          |
| Ekhlaspour L (4) | 78.6 ± 20.3                          | 50.9 ± 34.2      | 0 (0.0, 8.2)                                       | 0 (0.0, 6.4)   | 18.2 ± 21.4                                           | 44.5 ± 37       | n/a                                                   | n/a          |
